# Supplementary material for: Mice lacking inhibitory leptin receptor signals are lean with normal endocrine function
Source: JCI journal article supplement (doi:10.1172/jci30688), 2007-04-10

# Supplemental Figure 1

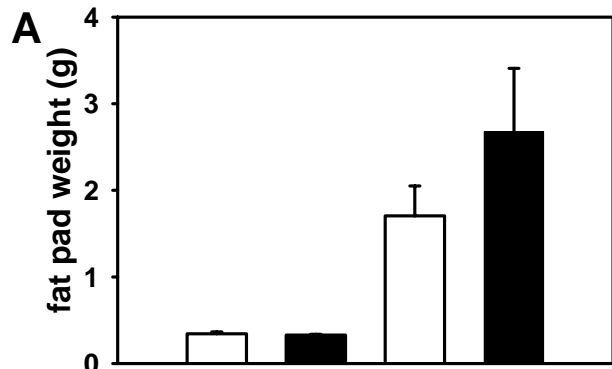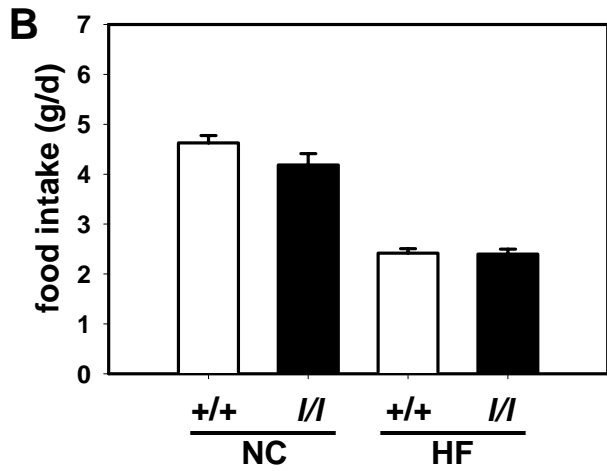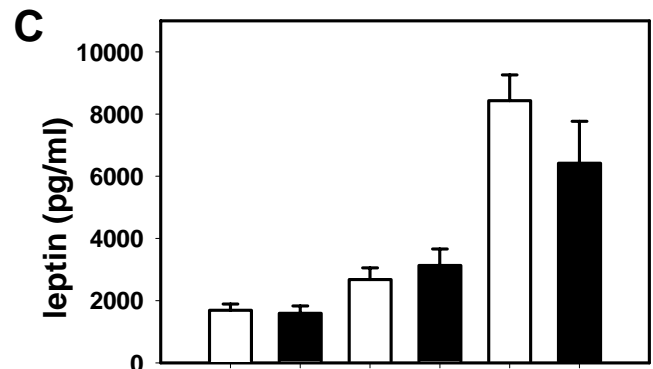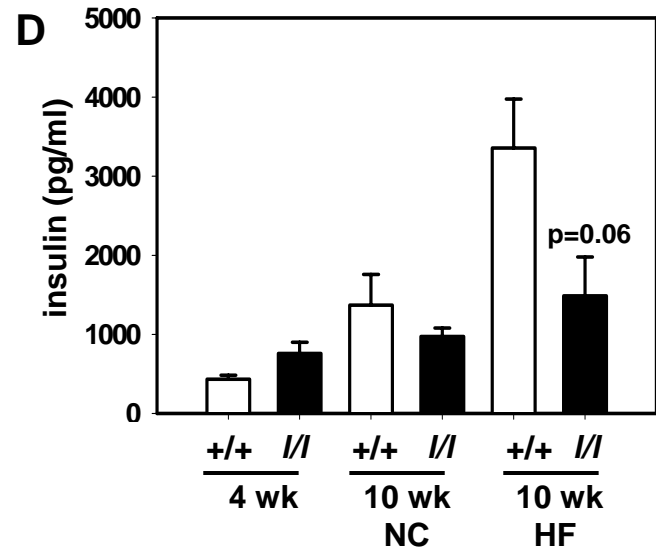

## Supplemental Figure 2

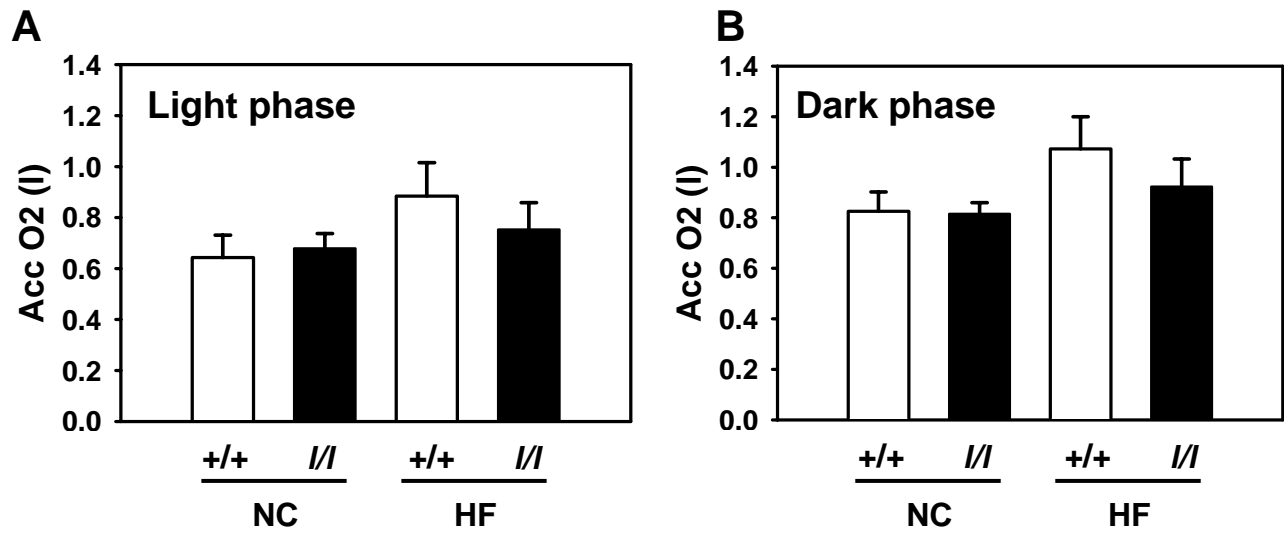

## Supplemental Material

### Supplemental Table

| <b>Supplemental Table. Phenotypes of <i>db/db</i> and <i>l/l</i> littermates derived by interbreeding <i>db/l</i> animals.</b> 8-week-old animals. Data are mean +/- SEM. Student's unpaired t-test: **p<0.01, ***p<0.001 versus <i>db/db</i> |              |               |
|-----------------------------------------------------------------------------------------------------------------------------------------------------------------------------------------------------------------------------------------------|--------------|---------------|
| Genotype                                                                                                                                                                                                                                      | <i>db/db</i> | <i>l/l</i>    |
| <i>Female mice</i>                                                                                                                                                                                                                            |              |               |
| Body weight (g)                                                                                                                                                                                                                               | 36.7 ± 1.8   | 18.5 ± 0.5*** |
| Fertility                                                                                                                                                                                                                                     | 0/7          | 7/7***        |
| <i>Male mice</i>                                                                                                                                                                                                                              |              |               |
| Body weight (g)                                                                                                                                                                                                                               | 38.5 ± 1.3   | 22.9 ± 0.7*** |
| Snout-anus length (mm)                                                                                                                                                                                                                        | 87.4 ± 0.6   | 90.6 ± 0.9**  |

### Supplemental Figure Legends.

**Figure S1. Food intake and measures of adiposity in male *+/+* and *l/l* animals fed NC or HF diets.** (A) Weight of perigonadal fat pads of male *+/+* and *l/l* animals from Figure 3 at time of sacrifice. (B) Food intake for the first week of divergent diet for male *l/l* and *+/+* animals. (C,D) Serum leptin and insulin levels from male *+/+* and *l/l* mice from Figure 3 at 4 and 10 weeks of age. All values represent mean +/- SEM. ANOVA: p=NS; p values for trends as noted.

**Figure S2. Oxygen Consumption by female +/+ and // animals.** Indirect calorimetry was measured in 14 week-old female mice provided a LF or HF diet using an open-circuit Oxymax system (Columbus Instruments, Columbus, OH). Mice were individually housed in plexiglass cages. After a 48-hour acclimatization period, exhaust air was sampled for 24 hours in the fed state for the determination of O<sub>2</sub> extraction. Total O<sub>2</sub> extracted (AccO<sub>2</sub>) during Light (A) and Dark (B) phase is shown. Data are not normalized to weight, since lean body mass was equivalent for all groups. All values represent means +/- SEM. Student's unpaired t-test, p=NS for all comparisons.

# Supplemental Figure 1

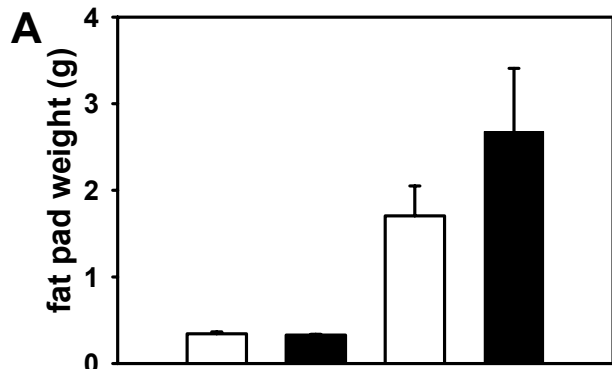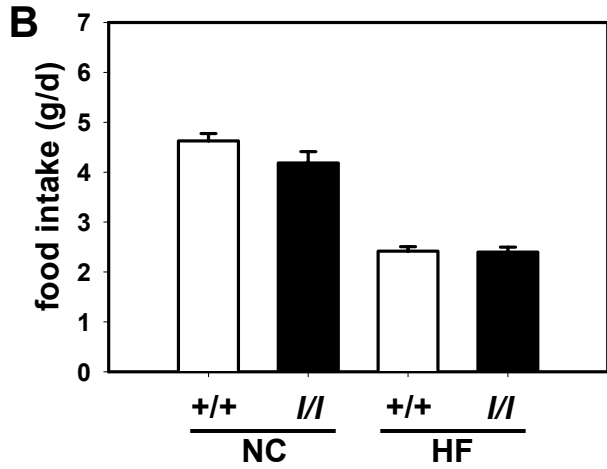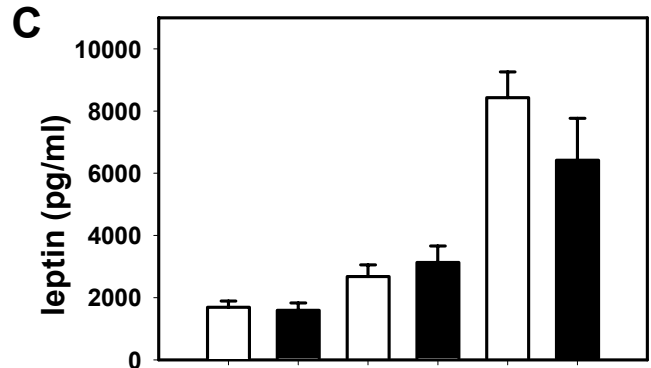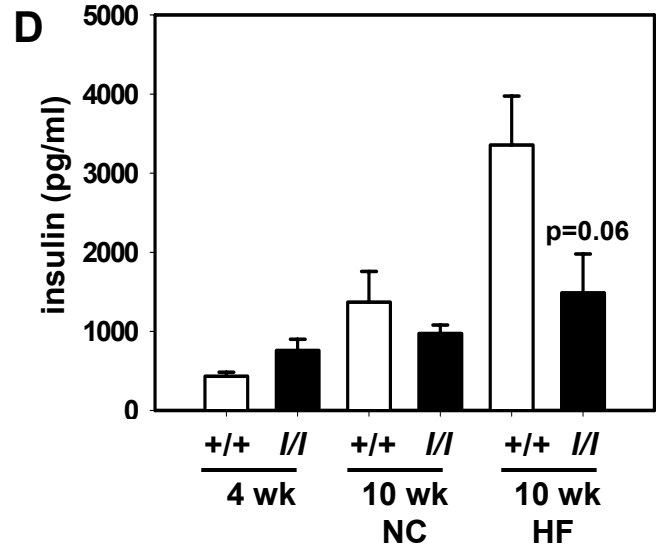

## Supplemental Figure 2

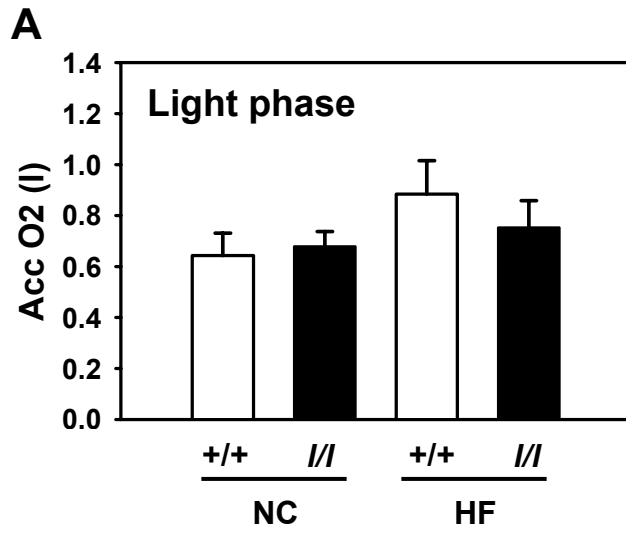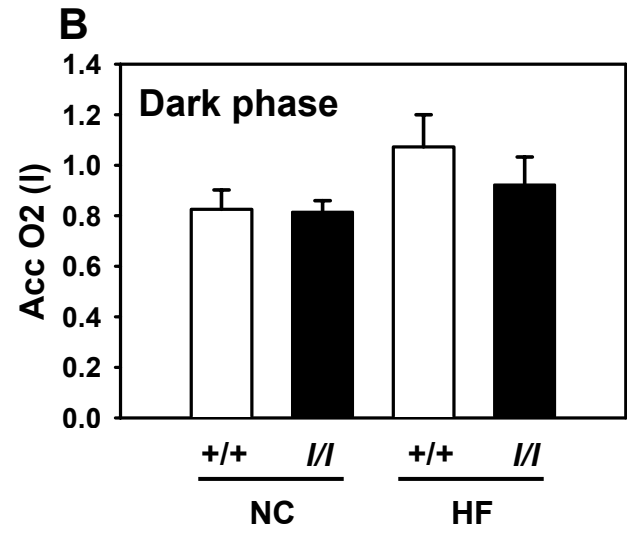

Supplement: sd1 [file 1]
